# Supplementary material for: Evaluation of Spatial Distribution of Three Major Leptocorisa (Hemiptera: Alydidae) Pests Using MaxEnt Model
Source: MDPI journal article supplement (doi:10.3390/insects13080750), 2022-08-20
Supplement: s1 [file s1]

Table S3. Pearson correlation matrix of bioclimatic variables in *L. oratoria*

|       |                     | Bio1   | Bio2    | Bio3    | Bio4    | Bio5    | Bio6    | Bio7    | Bio8    | Bio9    | Bio10   | Bio11   | Bio12   | Bio13  | Bio14  | Bio15   | Bio16  | Bio17  | Bio18   | Bio19  | Elevation |
|-------|---------------------|--------|---------|---------|---------|---------|---------|---------|---------|---------|---------|---------|---------|--------|--------|---------|--------|--------|---------|--------|-----------|
| Bio1  | Pearson correlation | 1      | .009    | .062    | -.271*  | .885**  | .802**  | -.097   | .890**  | .924**  | .929**  | .917**  | -.283*  | -.210  | -.122  | .044    | -.256  | -.127  | -.607** | .297*  | -.886**   |
|       | Sig. (2-tailed)     |        | .951    | .661    | .050    | .000    | .000    | .487    | .000    | .000    | .000    | .000    | .040    | .132   | .385   | .756    | .064   | .363   | .000    | .031   | .000      |
|       | N                   | 53     | 53      | 53      | 53      | 53      | 53      | 53      | 53      | 53      | 53      | 53      | 53      | 53     | 53     | 53      | 53     | 53     | 53      | 53     | 53        |
| Bio2  | Pearson correlation | .009   | 1       | -.193   | .484**  | .370**  | -.415** | .759**  | .246    | -.178   | .193    | -.189   | -.244   | -.167  | -.097  | .173    | -.171  | -.154  | -.201   | -.061  | -.121     |
|       | Sig. (2-tailed)     | .951   |         | .167    | .000    | .006    | .002    | .000    | .076    | .203    | .167    | .176    | .078    | .232   | .488   | .216    | .222   | .272   | .150    | .665   | .390      |
|       | N                   | 53     | 53      | 53      | 53      | 53      | 53      | 53      | 53      | 53      | 53      | 53      | 53      | 53     | 53     | 53      | 53     | 53     | 53      | 53     | 53        |
| Bio3  | Pearson correlation | .062   | -.193   | 1       | -.869** | -.278*  | .499**  | -.769** | -.269   | .339*   | -.272*  | .404**  | .390**  | -.087  | .455** | -.579** | -.016  | .475** | -.025   | .228   | .062      |
|       | Sig. (2-tailed)     | .661   | .167    |         | .000    | .044    | .000    | .000    | .051    | .013    | .049    | .003    | .004    | .538   | .001   | .000    | .911   | .000   | .859    | .101   | .658      |
|       | N                   | 53     | 53      | 53      | 53      | 53      | 53      | 53      | 53      | 53      | 53      | 53      | 53      | 53     | 53     | 53      | 53     | 53     | 53      | 53     | 53        |
| Bio4  | Pearson correlation | -.271* | .484**  | -.869** | 1       | .138    | -.748** | .915**  | .152    | -.580** | .095    | -.630** | -.268   | .114   | -.272* | .456**  | .057   | -.298* | .185    | -.213  | .037      |
|       | Sig. (2-tailed)     | .050   | .000    | .000    |         | .325    | .000    | .000    | .278    | .000    | .500    | .000    | .052    | .417   | .048   | .001    | .683   | .030   | .185    | .125   | .790      |
|       | N                   | 53     | 53      | 53      | 53      | 53      | 53      | 53      | 53      | 53      | 53      | 53      | 53      | 53     | 53     | 53      | 53     | 53     | 53      | 53     | 53        |
| Bio5  | Pearson correlation | .885** | .370**  | -.278*  | .138    | 1       | .475**  | .350*   | .941**  | .699**  | .975**  | .661**  | -.447** | -.224  | -.251  | .242    | -.294* | -.281* | -.626** | .227   | -.844**   |
|       | Sig. (2-tailed)     | .000   | .006    | .044    | .325    | .000    | .010    | .000    | .000    | .000    | .000    | .000    | .001    | .107   | .070   | .081    | .033   | .042   | .000    | .103   | .000      |
|       | N                   | 53     | 53      | 53      | 53      | 53      | 53      | 53      | 53      | 53      | 53      | 53      | 53      | 53     | 53     | 53      | 53     | 53     | 53      | 53     | 53        |
| Bio6  | Pearson correlation | .802** | -.415** | .499**  | -.748** | .475**  | 1       | -.658** | .482**  | .947**  | .556**  | .958**  | -.033   | -.171  | .082   | -.229   | -.185  | .101   | -.477** | .364** | -.597**   |
|       | Sig. (2-tailed)     | .000   | .002    | .000    | .000    | .000    |         | .000    | .000    | .000    | .000    | .000    | .813    | .222   | .561   | .099    | .185   | .471   | .000    | .007   | .000      |
|       | N                   | 53     | 53      | 53      | 53      | 53      | 53      | 53      | 53      | 53      | 53      | 53      | 53      | 53     | 53     | 53      | 53     | 53     | 53      | 53     | 53        |
| Bio7  | Pearson correlation | -.097  | .759**  | -.769** | .915**  | .350*   | -.658** | 1       | .292*   | -.410** | .242    | -.454** | -.347*  | -.010  | -.302* | .450**  | -.054  | -.348* | -.028   | -.194  | -.087     |
|       | Sig. (2-tailed)     | .487   | .000    | .000    | .000    | .010    | .000    |         | .034    | .002    | .080    | .001    | .011    | .944   | .028   | .001    | .699   | .011   | .843    | .164   | .537      |
|       | N                   | 53     | 53      | 53      | 53      | 53      | 53      | 53      | 53      | 53      | 53      | 53      | 53      | 53     | 53     | 53      | 53     | 53     | 53      | 53     | 53        |
| Bio8  | Pearson correlation | .890** | .246    | -.269   | .152    | .941**  | .482**  | .292*   | 1       | .659**  | .966**  | .650**  | -.455** | -.267  | -.231  | .208    | -.323* | -.250  | -.516** | .111   | -.906**   |
|       | Sig. (2-tailed)     | .000   | .076    | .051    | .278    | .000    | .000    | .034    |         | .000    | .000    | .000    | .001    | .054   | .096   | .134    | .018   | .071   | .000    | .430   | .000      |
|       | N                   | 53     | 53      | 53      | 53      | 53      | 53      | 53      | 53      | 53      | 53      | 53      | 53      | 53     | 53     | 53      | 53     | 53     | 53      | 53     | 53        |
| Bio9  | Pearson correlation | .924** | -.178   | .339*   | -.580** | .699**  | .947**  | -.410** | .659**  | 1       | .747**  | .989**  | -.116   | -.172  | .015   | -.143   | -.206  | .019   | -.588** | .418** | -.743**   |
|       | Sig. (2-tailed)     | .000   | .203    | .013    | .000    | .000    | .000    | .002    | .000    |         | .000    | .000    | .408    | .219   | .917   | .308    | .138   | .891   | .000    | .002   | .000      |
|       | N                   | 53     | 53      | 53      | 53      | 53      | 53      | 53      | 53      | 53      | 53      | 53      | 53      | 53     | 53     | 53      | 53     | 53     | 53      | 53     | 53        |
| Bio10 | Pearson correlation | .929** | .193    | -.272*  | .095    | .975**  | .556**  | .242    | .966**  | .747**  | 1       | .712**  | -.407** | -.182  | -.234  | .216    | -.257  | -.251  | -.582** | .251   | -.896**   |
|       | Sig. (2-tailed)     | .000   | .167    | .049    | .500    | .000    | .000    | .080    | .000    | .000    |         | .000    | .003    | .192   | .092   | .121    | .063   | .070   | .000    | .069   | .000      |
|       | N                   | 53     | 53      | 53      | 53      | 53      | 53      | 53      | 53      | 53      | 53      | 53      | 53      | 53     | 53     | 53      | 53     | 53     | 53      | 53     | 53        |
| Bio11 | Pearson correlation | .917** | -.189   | .404**  | -.630** | .661**  | .958**  | -.454** | .650**  | .989**  | .712**  | 1       | -.123   | -.217  | .005   | -.149   | -.233  | .010   | -.581** | .340*  | -.729**   |
|       | Sig. (2-tailed)     | .000   | .176    | .003    | .000    | .000    | .000    | .001    | .000    | .000    | .000    |         | .378    | .119   | .971   | .286    | .093   | .942   | .000    | .013   | .000      |
|       | N                   | 53     | 53      | 53      | 53      | 53      | 53      | 53      | 53      | 53      | 53      | 53      | 53      | 53     | 53     | 53      | 53     | 53     | 53      | 53     | 53        |
| Bio12 | Pearson correlation | -.283* | -.244   | .390**  | -.268   | -.447** | -.033   | -.347*  | -.455** | -.116   | -.407** | -.123   | 1       | .736** | .686** | -.453** | .765** | .704** | .640**  | .478** | .326*     |
|       | Sig. (2-tailed)     | .040   | .078    | .004    | .052    | .001    | .813    | .011    | .001    | .408    | .003    | .378    |         | .000   | .000   | .001    | .000   | .000   | .000    | .000   | .017      |
|       | N                   | 53     | 53      | 53      | 53      | 53      | 53      | 53      | 53      | 53      | 53      | 53      | 53      | 53     | 53     | 53      | 53     | 53     | 53      | 53     | 53        |
| Bio13 | Pearson correlation | -.210  | -.167   | -.087   | .114    | -.224   | -.171   | -.010   | -.267   | -.172   | -.182   | -.217   | .736**  | 1      | .161   | .175    | .979** | .177   | .480**  | .429** | .226      |
|       | Sig. (2-tailed)     | .132   | .232    | .538    | .417    | .107    | .222    | .944    | .054    | .219    | .192    | .119    | .000    |        | .249   | .210    | .000   | .206   | .000    | .001   | .104      |
|       | N                   | 53     | 53      | 53      | 53      | 53      | 53      | 53      | 53      | 53      | 53      | 53      | 53      | 53     | 53     | 53      | 53     | 53     | 53      | 53     | 53        |
| Bio14 | Pearson correlation | -.122  | -.097   | .455**  | -.272*  | -.251   | .082    | -.302*  | -.231   | .015    | -.234   | .005    | .686**  | .161   | 1      | -.796** | .163   | .987** | .450**  | .452** | .125      |
|       | Sig. (2-tailed)     | .385   | .488    | .001    | .048    | .070    | .561    | .028    | .096    | .917    | .092    | .971    | .000    | .249   |        | .000    | .243   | .000   | .001    | .001   | .373      |

|           |                     |         |       |         |        |         |         |        |         |         |         |         |         |        |         |         |        |         |        |        |        |
|-----------|---------------------|---------|-------|---------|--------|---------|---------|--------|---------|---------|---------|---------|---------|--------|---------|---------|--------|---------|--------|--------|--------|
| Bio15     | N                   | 53      | 53    | 53      | 53     | 53      | 53      | 53     | 53      | 53      | 53      | 53      | 53      | 53     | 53      | 53      | 53     | 53      | 53     | 53     |        |
|           | Pearson correlation | .044    | .173  | -.579** | .456** | .242    | -.229   | .450** | .208    | -.143   | .216    | -.149   | -.453** | .175   | -.796** | 1       | .180   | -.826** | -.270  | -.283* | -.023  |
|           | Sig. (2-tailed)     | .756    | .216  | .000    | .001   | .081    | .099    | .001   | .134    | .308    | .121    | .286    | .001    | .210   | .000    | .196    | .000   | .050    | .040   | .868   |        |
| Bio16     | N                   | 53      | 53    | 53      | 53     | 53      | 53      | 53     | 53      | 53      | 53      | 53      | 53      | 53     | 53      | 53      | 53     | 53      | 53     | 53     |        |
|           | Pearson correlation | -.256   | -.171 | -.016   | .057   | -.294*  | -.185   | -.054  | -.323*  | -.206   | -.257   | -.233   | .765**  | .979** | .163    | .180    | 1      | .169    | .502** | .365** | .279*  |
|           | Sig. (2-tailed)     | .064    | .222  | .911    | .683   | .033    | .185    | .699   | .018    | .138    | .063    | .093    | .000    | .000   | .243    | .196    | .227   | .000    | .007   | .043   |        |
| Bio17     | N                   | 53      | 53    | 53      | 53     | 53      | 53      | 53     | 53      | 53      | 53      | 53      | 53      | 53     | 53      | 53      | 53     | 53      | 53     | 53     |        |
|           | Pearson correlation | -.127   | -.154 | .475**  | -.298* | -.281*  | .101    | -.348* | -.250   | .019    | -.251   | .010    | .704**  | .177   | .987**  | -.826** | .169   | 1       | .482** | .452** | .131   |
|           | Sig. (2-tailed)     | .363    | .272  | .000    | .030   | .042    | .471    | .011   | .071    | .891    | .070    | .942    | .000    | .206   | .000    | .000    | .227   | .000    | .001   | .350   |        |
| Bio18     | N                   | 53      | 53    | 53      | 53     | 53      | 53      | 53     | 53      | 53      | 53      | 53      | 53      | 53     | 53      | 53      | 53     | 53      | 53     | 53     |        |
|           | Pearson correlation | -.607** | -.201 | -.025   | .185   | -.626** | -.477** | -.028  | -.516** | -.588** | -.582** | -.581** | .640**  | .480** | .450**  | -.270   | .502** | .482**  | 1      | -.032  | .546** |
|           | Sig. (2-tailed)     | .000    | .150  | .859    | .185   | .000    | .000    | .843   | .000    | .000    | .000    | .000    | .000    | .000   | .001    | .050    | .000   | .000    | .822   | .000   |        |
| Bio19     | N                   | 53      | 53    | 53      | 53     | 53      | 53      | 53     | 53      | 53      | 53      | 53      | 53      | 53     | 53      | 53      | 53     | 53      | 53     | 53     |        |
|           | Pearson correlation | .297*   | -.061 | .228    | -.213  | .227    | .364**  | -.194  | .111    | .418**  | .251    | .340*   | .478**  | .429** | .452**  | -.283*  | .365** | .452**  | -.032  | 1      | -.253  |
|           | Sig. (2-tailed)     | .031    | .665  | .101    | .125   | .103    | .007    | .164   | .430    | .002    | .069    | .013    | .000    | .001   | .001    | .040    | .007   | .001    | .822   | .068   |        |
| Elevation | N                   | 53      | 53    | 53      | 53     | 53      | 53      | 53     | 53      | 53      | 53      | 53      | 53      | 53     | 53      | 53      | 53     | 53      | 53     | 53     |        |
|           | Pearson correlation | -.886** | -.121 | .062    | .037   | -.844** | -.597** | -.087  | -.906** | -.743** | -.896** | -.729** | .326*   | .226   | .125    | -.023   | .279*  | .131    | .546** | -.253  | 1      |
|           | Sig. (2-tailed)     | .000    | .390  | .658    | .790   | .000    | .000    | .537   | .000    | .000    | .000    | .000    | .017    | .104   | .373    | .868    | .043   | .350    | .000   | .068   |        |
|           | N                   | 53      | 53    | 53      | 53     | 53      | 53      | 53     | 53      | 53      | 53      | 53      | 53      | 53     | 53      | 53      | 53     | 53      | 53     | 53     |        |

\*\*.

\*.
