# Supplementary material for: Evaluation of Spatial Distribution of Three Major Leptocorisa (Hemiptera: Alydidae) Pests Using MaxEnt Model
Source: MDPI journal article supplement (doi:10.3390/insects13080750), 2022-08-20
Supplement: s1 [file s1]

Table S1. Pearson correlation matrix of bioclimatic variables in *L. chinensis*

|       |                     | Bio1    | Bio2    | Bio3   | Bio4    | Bio5    | Bio6    | Bio7    | Bio8    | Bio9    | Bio10   | Bio11   | Bio12  | Bio13   | Bio14   | Bio15   | Bio16   | Bio17   | Bio18   | Bio19   | Elevation |
|-------|---------------------|---------|---------|--------|---------|---------|---------|---------|---------|---------|---------|---------|--------|---------|---------|---------|---------|---------|---------|---------|-----------|
| Bio1  | Pearson correlation | 1       | -.700** | -.069  | -.852** | .599**  | .945**  | -.825** | .605**  | .927**  | .909**  | .977**  | .084   | -.250   | .136    | -.319*  | -.165   | .088    | -.234   | .108    | -.598**   |
|       | Sig. (2-tailed)     |         | .000    | .628   | .000    | .000    | .000    | .000    | .000    | .000    | .000    | .000    | .557   | .076    | .343    | .023    | .247    | .541    | .098    | .451    | .000      |
|       | N                   | 51      | 51      | 51     | 51      | 51      | 51      | 51      | 51      | 51      | 51      | 51      | 51     | 51      | 51      | 51      | 51      | 51      | 51      | 51      | 51        |
| Bio2  | Pearson correlation | -.700** | 1       | .640** | .859**  | -.039   | -.859** | .934**  | -.295*  | -.857** | -.464** | -.792** | -.328* | .166    | -.425** | .444**  | .052    | -.414** | .187    | -.439** | .165      |
|       | Sig. (2-tailed)     | .000    |         | .000   | .000    | .788    | .000    | .000    | .036    | .000    | .001    | .000    | .019   | .244    | .002    | .001    | .716    | .003    | .188    | .001    | .246      |
|       | N                   | 51      | 51      | 51     | 51      | 51      | 51      | 51      | 51      | 51      | 51      | 51      | 51     | 51      | 51      | 51      | 51      | 51      | 51      | 51      | 51        |
| Bio3  | Pearson correlation | -.069   | .640**  | 1      | .175    | .173    | -.238   | .325*   | -.067   | -.273   | -.029   | -.130   | -.173  | .099    | -.243   | .233    | -.009   | -.278*  | .123    | -.297*  | .031      |
|       | Sig. (2-tailed)     | .628    | .000    |        | .218    | .224    | .093    | .020    | .640    | .053    | .842    | .364    | .224   | .488    | .086    | .100    | .947    | .048    | .389    | .034    | .830      |
|       | N                   | 51      | 51      | 51     | 51      | 51      | 51      | 51      | 51      | 51      | 51      | 51      | 51     | 51      | 51      | 51      | 51      | 51      | 51      | 51      | 51        |
| Bio4  | Pearson correlation | -.852** | .859**  | .175   | 1       | -.162   | -.939** | .977**  | -.314*  | -.920** | -.570** | -.936** | -.330* | .158    | -.387** | .440**  | .076    | -.351*  | .171    | -.370** | .226      |
|       | Sig. (2-tailed)     | .000    | .000    | .218   |         | .256    | .000    | .000    | .025    | .000    | .000    | .000    | .018   | .268    | .005    | .001    | .597    | .011    | .231    | .007    | .110      |
|       | N                   | 51      | 51      | 51     | 51      | 51      | 51      | 51      | 51      | 51      | 51      | 51      | 51     | 51      | 51      | 51      | 51      | 51      | 51      | 51      | 51        |
| Bio5  | Pearson correlation | .599**  | -.039   | .173   | -.162   | 1       | .435**  | -.117   | .370**  | .379**  | .856**  | .483**  | -.208  | -.455** | -.011   | -.292*  | -.422** | -.041   | -.401** | -.040   | -.667**   |
|       | Sig. (2-tailed)     | .000    | .788    | .224   | .256    |         | .001    | .414    | .008    | .006    | .000    | .000    | .144   | .001    | .937    | .038    | .002    | .773    | .004    | .783    | .000      |
|       | N                   | 51      | 51      | 51     | 51      | 51      | 51      | 51      | 51      | 51      | 51      | 51      | 51     | 51      | 51      | 51      | 51      | 51      | 51      | 51      | 51        |
| Bio6  | Pearson correlation | .945**  | -.859** | -.238  | -.939** | .435**  | 1       | -.945** | .421**  | .968**  | .781**  | .986**  | .235   | -.283*  | .371**  | -.491** | -.191   | .336*   | -.280*  | .357*   | -.385**   |
|       | Sig. (2-tailed)     | .000    | .000    | .093   | .000    | .001    |         | .000    | .002    | .000    | .000    | .000    | .097   | .044    | .007    | .000    | .180    | .016    | .047    | .010    | .005      |
|       | N                   | 51      | 51      | 51     | 51      | 51      | 51      | 51      | 51      | 51      | 51      | 51      | 51     | 51      | 51      | 51      | 51      | 51      | 51      | 51      | 51        |
| Bio7  | Pearson correlation | -.825** | .934**  | .325*  | .977**  | -.117   | -.945** | 1       | -.330*  | -.930** | -.550** | -.912** | -.335* | .147    | -.414** | .436**  | .057    | -.386** | .163    | -.408** | .183      |
|       | Sig. (2-tailed)     | .000    | .000    | .020   | .000    | .414    | .000    |         | .018    | .000    | .000    | .000    | .016   | .304    | .003    | .001    | .689    | .005    | .252    | .003    | .200      |
|       | N                   | 51      | 51      | 51     | 51      | 51      | 51      | 51      | 51      | 51      | 51      | 51      | 51     | 51      | 51      | 51      | 51      | 51      | 51      | 51      | 51        |
| Bio8  | Pearson correlation | .605**  | -.295*  | -.067  | -.314*  | .370**  | .421**  | -.330*  | 1       | .514**  | .636**  | .475**  | -.063  | .227    | -.400** | .368**  | .317*   | -.425** | .267    | -.402** | -.691**   |
|       | Sig. (2-tailed)     | .000    | .036    | .640   | .025    | .008    | .002    | .018    |         | .000    | .000    | .000    | .659   | .110    | .004    | .008    | .023    | .002    | .058    | .003    | .000      |
|       | N                   | 51      | 51      | 51     | 51      | 51      | 51      | 51      | 51      | 51      | 51      | 51      | 51     | 51      | 51      | 51      | 51      | 51      | 51      | 51      | 51        |
| Bio9  | Pearson correlation | .927**  | -.857** | -.273  | -.920** | .379**  | .968**  | -.930** | .514**  | 1       | .756**  | .960**  | .268   | -.179   | .313*   | -.397** | -.078   | .279*   | -.170   | .306*   | -.386**   |
|       | Sig. (2-tailed)     | .000    | .000    | .053   | .000    | .006    | .000    | .000    | .000    |         | .000    | .000    | .057   | .210    | .026    | .004    | .584    | .047    | .234    | .029    | .005      |
|       | N                   | 51      | 51      | 51     | 51      | 51      | 51      | 51      | 51      | 51      | 51      | 51      | 51     | 51      | 51      | 51      | 51      | 51      | 51      | 51      | 51        |
| Bio10 | Pearson correlation | .909**  | -.464** | -.029  | -.570** | .856**  | .781**  | -.550** | .636**  | .756**  | 1       | .821**  | -.104  | -.353*  | .006    | -.269   | -.280*  | -.036   | -.321*  | -.021   | -.754**   |
|       | Sig. (2-tailed)     | .000    | .001    | .842   | .000    | .000    | .000    | .000    | .000    | .000    |         | .000    | .467   | .011    | .964    | .056    | .047    | .801    | .022    | .884    | .000      |
|       | N                   | 51      | 51      | 51     | 51      | 51      | 51      | 51      | 51      | 51      | 51      | 51      | 51     | 51      | 51      | 51      | 51      | 51      | 51      | 51      | 51        |
| Bio11 | Pearson correlation | .977**  | -.792** | -.130  | -.936** | .483**  | .986**  | -.912** | .475**  | .960**  | .821**  | 1       | .189   | -.270   | .285*   | -.434** | -.182   | .242    | -.263   | .262    | -.465**   |
|       | Sig. (2-tailed)     | .000    | .000    | .364   | .000    | .000    | .000    | .000    | .000    | .000    | .000    |         | .183   | .056    | .042    | .001    | .200    | .087    | .063    | .063    | .001      |
|       | N                   | 51      | 51      | 51     | 51      | 51      | 51      | 51      | 51      | 51      | 51      | 51      | 51     | 51      | 51      | 51      | 51      | 51      | 51      | 51      | 51        |
| Bio12 | Pearson correlation | .084    | -.328*  | -.173  | -.330*  | -.208   | .235    | -.335*  | -.063   | .268    | -.104   | .189    | 1      | .502**  | .444**  | -.164   | .564**  | .499**  | .533**  | .517**  | .311*     |
|       | Sig. (2-tailed)     | .557    | .019    | .224   | .018    | .144    | .097    | .016    | .659    | .057    | .467    | .183    |        | .000    | .001    | .250    | .000    | .000    | .000    | .000    | .026      |
|       | N                   | 51      | 51      | 51     | 51      | 51      | 51      | 51      | 51      | 51      | 51      | 51      | 51     | 51      | 51      | 51      | 51      | 51      | 51      | 51      | 51        |
| Bio13 | Pearson correlation | -.250   | .166    | .099   | .158    | -.455** | -.283*  | .147    | .227    | -.179   | -.353*  | -.270   | .502** | 1       | -.446** | .751**  | .976**  | -.385** | .973**  | -.369** | .209      |
|       | Sig. (2-tailed)     | .076    | .244    | .488   | .268    | .001    | .044    | .304    | .110    | .210    | .011    | .056    | .000   |         | .001    | .000    | .000    | .005    | .000    | .008    | .141      |
|       | N                   | 51      | 51      | 51     | 51      | 51      | 51      | 51      | 51      | 51      | 51      | 51      | 51     | 51      | 51      | 51      | 51      | 51      | 51      | 51      | 51        |
| Bio14 | Pearson correlation | .136    | -.425** | -.243  | -.387** | -.011   | .371**  | -.414** | -.400** | .313*   | .006    | .285*   | .444** | -.446** | 1       | -.886** | -.406** | .991**  | -.419** | .990**  | .373**    |
|       | Sig. (2-tailed)     | .343    | .002    | .086   | .005    | .937    | .007    | .003    | .004    | .026    | .964    | .042    | .001   |         | .001    | .000    | .003    | .000    | .002    | .000    | .007      |

|           |                     |         |         |        |         |         |         |         |         |         |         |         |        |         |         |         |        |         |         |         |        |
|-----------|---------------------|---------|---------|--------|---------|---------|---------|---------|---------|---------|---------|---------|--------|---------|---------|---------|--------|---------|---------|---------|--------|
| Bio15     | N                   | 51      | 51      | 51     | 51      | 51      | 51      | 51      | 51      | 51      | 51      | 51      | 51     | 51      | 51      | 51      | 51     | 51      | 51      | 51      |        |
|           | Pearson correlation | -.319*  | .444**  | .233   | .440**  | -.292*  | -.491** | .436**  | .368**  | -.397** | -.269   | -.434** | -.164  | .751**  | -.886** | 1       | .707** | -.858** | .730**  | -.853** | -.096  |
|           | Sig. (2-tailed)     | .023    | .001    | .100   | .001    | .038    | .000    | .001    | .008    | .004    | .056    | .001    | .250   | .000    | .000    | .000    | .000   | .000    | .000    | .000    | .503   |
| Bio16     | N                   | 51      | 51      | 51     | 51      | 51      | 51      | 51      | 51      | 51      | 51      | 51      | 51     | 51      | 51      | 51      | 51     | 51      | 51      | 51      |        |
|           | Pearson correlation | -.165   | .052    | -.009  | .076    | -.422** | -.191   | .057    | .317*   | -.078   | -.280*  | -.182   | .564** | .976**  | -.406** | .707**  | 1      | -.343*  | .973**  | -.324*  | .108   |
|           | Sig. (2-tailed)     | .247    | .716    | .947   | .597    | .002    | .180    | .689    | .023    | .584    | .047    | .200    | .000   | .000    | .003    | .000    | .014   | .000    | .020    | .449    |        |
| Bio17     | N                   | 51      | 51      | 51     | 51      | 51      | 51      | 51      | 51      | 51      | 51      | 51      | 51     | 51      | 51      | 51      | 51     | 51      | 51      | 51      |        |
|           | Pearson correlation | .088    | -.414** | -.278* | -.351*  | -.041   | .336*   | -.386** | -.425** | .279*   | -.036   | .242    | .499** | -.385** | .991**  | -.858** | -.343* | 1       | -.368** | .999**  | .389** |
|           | Sig. (2-tailed)     | .541    | .003    | .048   | .011    | .773    | .016    | .005    | .002    | .047    | .801    | .087    | .000   | .005    | .000    | .000    | .014   | .008    | .000    | .005    |        |
| Bio18     | N                   | 51      | 51      | 51     | 51      | 51      | 51      | 51      | 51      | 51      | 51      | 51      | 51     | 51      | 51      | 51      | 51     | 51      | 51      | 51      |        |
|           | Pearson correlation | -.234   | .187    | .123   | .171    | -.401** | -.280*  | .163    | .267    | -.170   | -.321*  | -.263   | .533** | .973**  | -.419** | .730**  | .973** | -.368** | 1       | -.351*  | .174   |
|           | Sig. (2-tailed)     | .098    | .188    | .389   | .231    | .004    | .047    | .252    | .058    | .234    | .022    | .063    | .000   | .000    | .002    | .000    | .000   | .008    | .012    | .223    |        |
| Bio19     | N                   | 51      | 51      | 51     | 51      | 51      | 51      | 51      | 51      | 51      | 51      | 51      | 51     | 51      | 51      | 51      | 51     | 51      | 51      | 51      |        |
|           | Pearson correlation | .108    | -.439** | -.297* | -.370** | -.040   | .357*   | -.408** | -.402** | .306*   | -.021   | .262    | .517** | -.369** | .990**  | -.853** | -.324* | .999**  | -.351*  | 1       | .388** |
|           | Sig. (2-tailed)     | .451    | .001    | .034   | .007    | .783    | .010    | .003    | .003    | .029    | .884    | .063    | .000   | .008    | .000    | .000    | .020   | .000    | .012    | .005    |        |
| Elevation | N                   | 51      | 51      | 51     | 51      | 51      | 51      | 51      | 51      | 51      | 51      | 51      | 51     | 51      | 51      | 51      | 51     | 51      | 51      | 51      |        |
|           | Pearson correlation | -.598** | .165    | .031   | .226    | -.667** | -.385** | .183    | -.691** | -.386** | -.754** | -.465** | .311*  | .209    | .373**  | -.096   | .108   | .389**  | .174    | .388**  | 1      |
|           | Sig. (2-tailed)     | .000    | .246    | .830   | .110    | .000    | .005    | .200    | .000    | .005    | .000    | .001    | .026   | .141    | .007    | .503    | .449   | .005    | .223    | .005    |        |
|           | N                   | 51      | 51      | 51     | 51      | 51      | 51      | 51      | 51      | 51      | 51      | 51      | 51     | 51      | 51      | 51      | 51     | 51      | 51      | 51      |        |

\*\*.

\*.
