# Supplementary material for: Evaluation of Spatial Distribution of Three Major Leptocorisa (Hemiptera: Alydidae) Pests Using MaxEnt Model
Source: MDPI journal article supplement (doi:10.3390/insects13080750), 2022-08-20
Supplement: s1 [file s1]

Table S2. Pearson correlation matrix of bioclimatic variables in *L. acuta*

|       |                     | Bio1    | Bio2    | Bio3    | Bio4    | Bio5    | Bio6    | Bio7    | Bio8   | Bio9    | Bio10   | Bio11   | Bio12   | Bio13   | Bio14   | Bio15   | Bio16   | Bio17   | Bio18   | Bio19  | Elevation |
|-------|---------------------|---------|---------|---------|---------|---------|---------|---------|--------|---------|---------|---------|---------|---------|---------|---------|---------|---------|---------|--------|-----------|
| Bio1  | Pearson correlation | 1       | .019    | .540**  | -.693** | .791**  | .854**  | -.445** | .776** | .800**  | .907**  | .961**  | .092    | .252    | -.392** | .658**  | .320*   | -.387** | -.054   | .000   | -.340**   |
|       | Sig. (2-tailed)     |         | .887    | .000    | .000    | .000    | .000    | .000    | .000   | .000    | .000    | .000    | .489    | .054    | .002    | .000    | .013    | .002    | .685    | .998   | .008      |
|       | N                   | 59      | 59      | 59      | 59      | 59      | 59      | 59      | 59     | 59      | 59      | 59      | 59      | 59      | 59      | 59      | 59      | 59      | 59      | 59     | 59        |
| Bio2  | Pearson correlation | .019    | 1       | .432**  | -.019   | .476**  | -.357** | .679**  | -.146  | .070    | .008    | .006    | -.577** | -.384** | -.401** | .134    | -.467** | -.409** | -.561** | -.228  | -.075     |
|       | Sig. (2-tailed)     | .887    |         | .001    | .887    | .000    | .006    | .000    | .269   | .597    | .950    | .963    | .000    | .003    | .002    | .312    | .000    | .001    | .000    | .082   | .574      |
|       | N                   | 59      | 59      | 59      | 59      | 59      | 59      | 59      | 59     | 59      | 59      | 59      | 59      | 59      | 59      | 59      | 59      | 59      | 59      | 59     | 59        |
| Bio3  | Pearson correlation | .540**  | .432**  | 1       | -.856** | .399**  | .543**  | -.346** | .090   | .722**  | .210    | .699**  | -.133   | -.008   | -.321*  | .251    | -.016   | -.272*  | -.382** | .095   | -.125     |
|       | Sig. (2-tailed)     | .000    | .001    |         | .000    | .002    | .000    | .007    | .499   | .000    | .110    | .000    | .314    | .955    | .013    | .056    | .902    | .037    | .003    | .472   | .345      |
|       | N                   | 59      | 59      | 59      | 59      | 59      | 59      | 59      | 59     | 59      | 59      | 59      | 59      | 59      | 59      | 59      | 59      | 59      | 59      | 59     | 59        |
| Bio4  | Pearson correlation | -.693** | -.019   | -.856** | 1       | -.325*  | -.833** | .708**  | -.245  | -.832** | -.330*  | -.865** | -.118   | -.233   | .251    | -.382** | -.268*  | .209    | .169    | -.140  | .070      |
|       | Sig. (2-tailed)     | .000    | .887    | .000    |         | .012    | .000    | .000    | .061   | .000    | .011    | .000    | .373    | .076    | .055    | .003    | .040    | .112    | .201    | .291   | .597      |
|       | N                   | 59      | 59      | 59      | 59      | 59      | 59      | 59      | 59     | 59      | 59      | 59      | 59      | 59      | 59      | 59      | 59      | 59      | 59      | 59     | 59        |
| Bio5  | Pearson correlation | .791**  | .476**  | .399**  | -.325*  | 1       | .419**  | .157    | .580** | .611**  | .856**  | .674**  | -.230   | -.047   | -.472** | .579**  | -.015   | -.503** | -.333*  | -.103  | -.374**   |
|       | Sig. (2-tailed)     | .000    | .000    | .002    | .012    |         | .001    | .236    | .000   | .000    | .000    | .000    | .080    | .722    | .000    | .000    | .910    | .000    | .010    | .438   | .003      |
|       | N                   | 59      | 59      | 59      | 59      | 59      | 59      | 59      | 59     | 59      | 59      | 59      | 59      | 59      | 59      | 59      | 59      | 59      | 59      | 59     | 59        |
| Bio6  | Pearson correlation | .854**  | -.357** | .543**  | -.833** | .419**  | 1       | -.831** | .548** | .830**  | .644**  | .921**  | .317*   | .377**  | -.168   | .461**  | .462**  | -.142   | .073    | .201   | -.207     |
|       | Sig. (2-tailed)     | .000    | .006    | .000    | .000    | .001    |         | .000    | .000   | .000    | .000    | .000    | .014    | .003    | .204    | .000    | .000    | .283    | .584    | .128   | .116      |
|       | N                   | 59      | 59      | 59      | 59      | 59      | 59      | 59      | 59     | 59      | 59      | 59      | 59      | 59      | 59      | 59      | 59      | 59      | 59      | 59     | 59        |
| Bio7  | Pearson correlation | -.445** | .679**  | -.346** | .708**  | .157    | -.831** | 1       | -.240  | -.529** | -.177   | -.590** | -.485** | -.439** | -.106   | -.147   | -.511** | -.153   | -.283*  | -.281* | -.004     |
|       | Sig. (2-tailed)     | .000    | .000    | .007    | .000    | .236    | .000    |         | .067   | .000    | .180    | .000    | .000    | .001    | .422    | .266    | .000    | .247    | .030    | .031   | .976      |
|       | N                   | 59      | 59      | 59      | 59      | 59      | 59      | 59      | 59     | 59      | 59      | 59      | 59      | 59      | 59      | 59      | 59      | 59      | 59      | 59     | 59        |
| Bio8  | Pearson correlation | .776**  | -.146   | .090    | -.245   | .580**  | .548**  | -.240   | 1      | .279*   | .856**  | .626**  | .180    | .258*   | -.206   | .544**  | .326*   | -.208   | .254    | -.126  | -.264*    |
|       | Sig. (2-tailed)     | .000    | .269    | .499    | .061    | .000    | .000    | .067    |        | .033    | .000    | .000    | .171    | .049    | .117    | .000    | .012    | .114    | .052    | .343   | .044      |
|       | N                   | 59      | 59      | 59      | 59      | 59      | 59      | 59      | 59     | 59      | 59      | 59      | 59      | 59      | 59      | 59      | 59      | 59      | 59      | 59     | 59        |
| Bio9  | Pearson correlation | .800**  | .070    | .722**  | -.832** | .611**  | .830**  | -.529** | .279*  | 1       | .580**  | .882**  | .106    | .279*   | -.380** | .517**  | .313*   | -.351** | -.196   | .186   | -.239     |
|       | Sig. (2-tailed)     | .000    | .597    | .000    | .000    | .000    | .000    | .000    | .033   |         | .000    | .000    | .425    | .032    | .003    | .000    | .016    | .006    | .136    | .158   | .069      |
|       | N                   | 59      | 59      | 59      | 59      | 59      | 59      | 59      | 59     | 59      | 59      | 59      | 59      | 59      | 59      | 59      | 59      | 59      | 59      | 59     | 59        |
| Bio10 | Pearson correlation | .907**  | .008    | .210    | -.330*  | .856**  | .644**  | -.177   | .856** | .580**  | 1       | .759**  | .055    | .188    | -.351** | .621**  | .259*   | -.372** | -.001   | -.038  | -.427**   |
|       | Sig. (2-tailed)     | .000    | .950    | .110    | .011    | .000    | .000    | .180    | .000   | .000    |         | .000    | .680    | .154    | .006    | .000    | .048    | .004    | .997    | .775   | .001      |
|       | N                   | 59      | 59      | 59      | 59      | 59      | 59      | 59      | 59     | 59      | 59      | 59      | 59      | 59      | 59      | 59      | 59      | 59      | 59      | 59     | 59        |
| Bio11 | Pearson correlation | .961**  | .006    | .699**  | -.865** | .674**  | .921**  | -.590** | .626** | .882**  | .759**  | 1       | .118    | .265*   | -.356** | .591**  | .328*   | -.337** | -.108   | .078   | -.271*    |
|       | Sig. (2-tailed)     | .000    | .963    | .000    | .000    | .000    | .000    | .000    | .000   | .000    | .000    |         | .373    | .043    | .006    | .000    | .011    | .009    | .416    | .555   | .038      |
|       | N                   | 59      | 59      | 59      | 59      | 59      | 59      | 59      | 59     | 59      | 59      | 59      | 59      | 59      | 59      | 59      | 59      | 59      | 59      | 59     | 59        |
| Bio12 | Pearson correlation | .092    | -.577** | -.133   | -.118   | -.230   | .317*   | -.485** | .180   | .106    | .055    | .118    | 1       | .829**  | .538**  | -.042   | .870**  | .573**  | .744**  | .545** | .163      |
|       | Sig. (2-tailed)     | .489    | .000    | .314    | .373    | .080    | .014    | .000    | .171   | .425    | .680    | .373    |         | .000    | .000    | .750    | .000    | .000    | .000    | .000   | .218      |
|       | N                   | 59      | 59      | 59      | 59      | 59      | 59      | 59      | 59     | 59      | 59      | 59      | 59      | 59      | 59      | 59      | 59      | 59      | 59      | 59     | 59        |
| Bio13 | Pearson correlation | .252    | -.384** | -.008   | -.233   | -.047   | .377**  | -.439** | .258*  | .279*   | .188    | .265*   | .829**  | 1       | .082    | .420**  | .973**  | .136    | .735**  | .409** | .170      |
|       | Sig. (2-tailed)     | .054    | .003    | .955    | .076    | .722    | .003    | .001    | .049   | .032    | .154    | .043    | .000    |         | .537    | .001    | .000    | .305    | .000    | .001   | .199      |
|       | N                   | 59      | 59      | 59      | 59      | 59      | 59      | 59      | 59     | 59      | 59      | 59      | 59      | 59      | 59      | 59      | 59      | 59      | 59      | 59     | 59        |
| Bio14 | Pearson correlation | -.392** | -.401** | -.321*  | .251    | -.472** | -.168   | -.106   | -.206  | -.380** | -.351** | -.356** | .538**  | .082    | 1       | -.731** | .099    | .979**  | .280*   | .399** | .101      |
|       | Sig. (2-tailed)     | .002    | .002    | .013    | .055    | .000    | .204    | .422    | .117   | .003    | .006    | .006    | .000    | .537    |         | .000    | .457    | .000    | .032    | .002   | .448      |

|           |                     |         |         |         |         |         |        |         |        |         |         |         |        |        |         |         |        |         |        |        |       |
|-----------|---------------------|---------|---------|---------|---------|---------|--------|---------|--------|---------|---------|---------|--------|--------|---------|---------|--------|---------|--------|--------|-------|
| Bio15     | N                   | 59      | 59      | 59      | 59      | 59      | 59     | 59      | 59     | 59      | 59      | 59      | 59     | 59     | 59      | 59      | 59     | 59      | 59     | 59     |       |
|           | Pearson correlation | .658**  | .134    | .251    | -.382** | .579**  | .461** | -.147   | .544** | .517**  | .621**  | .591**  | -.042  | .420** | -.731** | 1       | .417** | -.733** | .166   | -.253  | .034  |
|           | Sig. (2-tailed)     | .000    | .312    | .056    | .003    | .000    | .000   | .266    | .000   | .000    | .000    | .000    | .750   | .001   | .000    | .001    | .000   | .208    | .053   | .801   |       |
| Bio16     | N                   | 59      | 59      | 59      | 59      | 59      | 59     | 59      | 59     | 59      | 59      | 59      | 59     | 59     | 59      | 59      | 59     | 59      | 59     | 59     |       |
|           | Pearson correlation | .320*   | -.467** | -.016   | -.268*  | -.015   | .462** | -.511** | .326*  | .313*   | .259*   | .328*   | .870** | .973** | .099    | .417**  | 1      | .138    | .757** | .398** | .143  |
|           | Sig. (2-tailed)     | .013    | .000    | .902    | .040    | .910    | .000   | .000    | .012   | .016    | .048    | .011    | .000   | .000   | .457    | .001    |        | .298    | .000   | .002   | .279  |
| Bio17     | N                   | 59      | 59      | 59      | 59      | 59      | 59     | 59      | 59     | 59      | 59      | 59      | 59     | 59     | 59      | 59      | 59     | 59      | 59     | 59     |       |
|           | Pearson correlation | -.387** | -.409** | -.272*  | .209    | -.503** | -.142  | -.153   | -.208  | -.351** | -.372** | -.337** | .573** | .136   | .979**  | -.733** | .138   | 1       | .312*  | .422** | .115  |
|           | Sig. (2-tailed)     | .002    | .001    | .037    | .112    | .000    | .283   | .247    | .114   | .006    | .004    | .009    | .000   | .305   | .000    | .000    | .298   |         | .016   | .001   | .385  |
| Bio18     | N                   | 59      | 59      | 59      | 59      | 59      | 59     | 59      | 59     | 59      | 59      | 59      | 59     | 59     | 59      | 59      | 59     | 59      | 59     | 59     |       |
|           | Pearson correlation | -.054   | -.561** | -.382** | .169    | -.333*  | .073   | -.283*  | .254   | -.196   | -.001   | -.108   | .744** | .735** | .280*   | .166    | .757** | .312*   | 1      | .043   | .255  |
|           | Sig. (2-tailed)     | .685    | .000    | .003    | .201    | .010    | .584   | .030    | .052   | .136    | .997    | .416    | .000   | .000   | .032    | .208    | .000   | .016    |        | .746   | .051  |
| Bio19     | N                   | 59      | 59      | 59      | 59      | 59      | 59     | 59      | 59     | 59      | 59      | 59      | 59     | 59     | 59      | 59      | 59     | 59      | 59     | 59     |       |
|           | Pearson correlation | .000    | -.228   | .095    | -.140   | -.103   | .201   | -.281*  | -.126  | .186    | -.038   | .078    | .545** | .409** | .399**  | -.253   | .398** | .422**  | .043   | 1      | -.004 |
|           | Sig. (2-tailed)     | .998    | .082    | .472    | .291    | .438    | .128   | .031    | .343   | .158    | .775    | .555    | .000   | .001   | .002    | .053    | .002   | .001    | .746   |        | .973  |
| Elevation | N                   | 59      | 59      | 59      | 59      | 59      | 59     | 59      | 59     | 59      | 59      | 59      | 59     | 59     | 59      | 59      | 59     | 59      | 59     | 59     |       |
|           | Pearson correlation | -.340** | -.075   | -.125   | .070    | -.374** | -.207  | -.004   | -.264* | -.239   | -.427** | -.271*  | .163   | .170   | .101    | .034    | .143   | .115    | .255   | -.004  | 1     |
|           | Sig. (2-tailed)     | .008    | .574    | .345    | .597    | .003    | .116   | .976    | .044   | .069    | .001    | .038    | .218   | .199   | .448    | .801    | .279   | .385    | .051   | .973   |       |
|           | N                   | 59      | 59      | 59      | 59      | 59      | 59     | 59      | 59     | 59      | 59      | 59      | 59     | 59     | 59      | 59      | 59     | 59      | 59     | 59     |       |

\*\*.

\*.
